# Supplementary material for: A Comparison of Solubility, Stability, and Bioavailability between Astilbin and Neoastilbin Isolated from Smilax glabra Rhizoma
Source: PubMed Central journal article supplement (PMC7587598; doi:10.3390/molecules25204728), 2020-10-15
Supplement: molecules-25-04728-s001.pdf [file molecules-25-04728-s001.pdf]

Supplementary Materials

# A Comparison of Solubility, Stability, and Bioavailability between Astilbin and Neoastilbin Isolated from *Smilax glabra* Rhizoma

Dan Zheng, Yi-Ting Ruan, Zhong-Ping Yin and Qing-Feng Zhang \*

Jiangxi Key Laboratory of Natural Product and Functional Food, College of Food Science and Engineering, Jiangxi Agricultural University, Nanchang 330045, China; zhengdan0829@163.com (D.Z.); elain1117@163.com (Y.-T.R.); yinzp2008@sina.com (Z.-P.Y.)

\* Correspondence: zhqf619@126.com; zhqf619@jxau.edu.cn; Tel.: +86-791-3813863 (Q.F.)

Received: 30 August 2020; Accepted: 12 October 2020; Published: date

Academic Editor: Nawaf Al-Maharik

**Abstract:** Astilbin and neoastilbin are two flavonoid stereoisomers. In the present study, their solubility, stability, and bioavailability were compared in a rat. The results revealed that the water solubility of astilbin and neoastilbin was 132.72  $\mu\text{g/mL}$  and 217.16  $\mu\text{g/mL}$ , respectively. The oil–water distribution coefficient ( $\log P$ ) of astilbin and neoastilbin in simulated gastric fluid (SGF) was 1.57 and 1.39, and in simulated intestinal fluid (SIF) was 1.09 and 0.98, respectively. In SIF, about 78.6% astilbin remained after 4 h of incubation at 37 °C, while this value was 88.3% for neoastilbin. Most of the degraded astilbin and neoastilbin were isomerized into their cis-trans-isomer, namely neoisoastilbin and isoastilbin, respectively, and the decomposed parts were rare. For bioavailability comparison in a rat, an HPLC method for trace amounts of astilbin and neoastilbin determination in plasma was developed, and the pretreatment of plasma was optimized. A pharmacokinetic study showed that the absolute bioavailability of astilbin and neoastilbin in a rat showed no significant difference with values of 0.30% and 0.28%, respectively.

**Keywords:** astilbin; neoastilbin; solubility; stability; bioavailability

**Table S1.** The recovery of astilbin and neoastilbin in spiked plasma (1  $\mu\text{g/mL}$ ) treated with different volumes of methanol (n = 3).

| Volume( $\mu\text{L}$ ) | Recovery (%)     |                  |
|-------------------------|------------------|------------------|
|                         | Astilbin         | Neoastilbin      |
| 150                     | 85.35 $\pm$ 3.86 | 86.49 $\pm$ 2.70 |
| 200                     | 82.47 $\pm$ 1.09 | 84.18 $\pm$ 0.74 |
| 250                     | 79.09 $\pm$ 1.50 | 84.75 $\pm$ 3.07 |

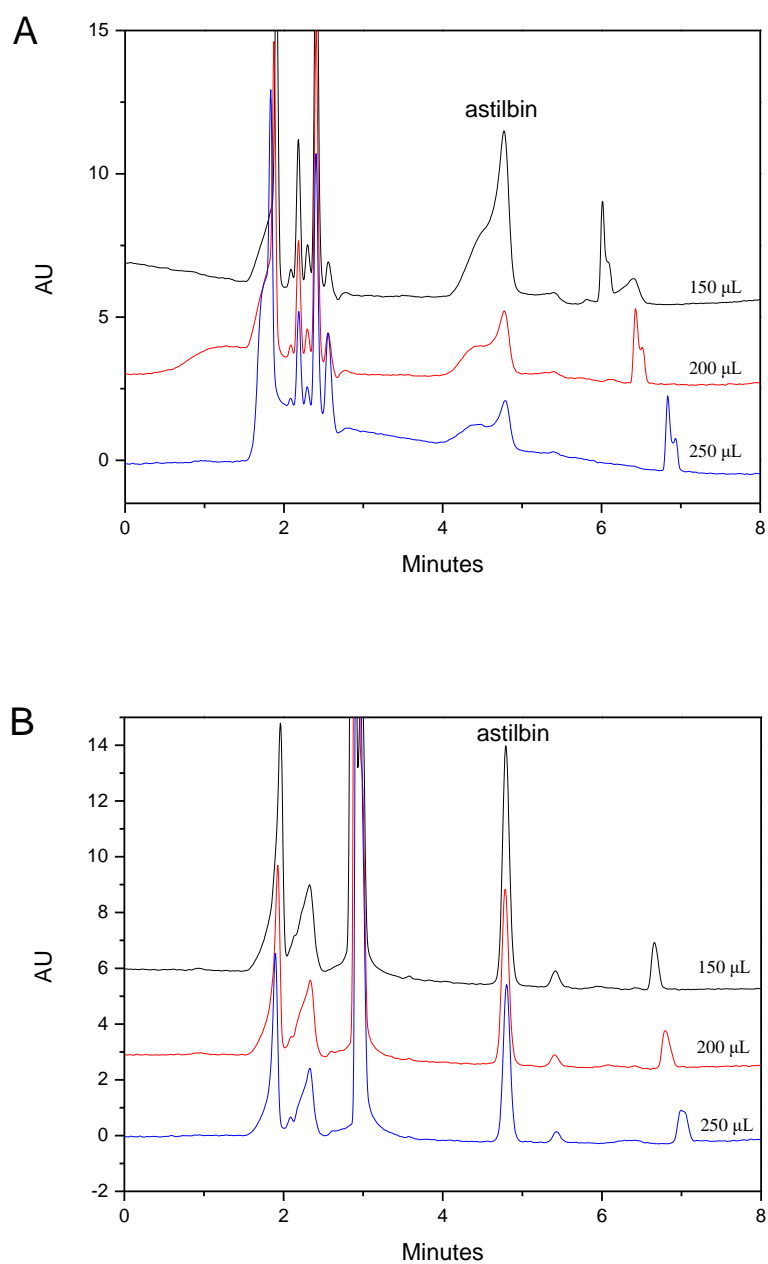

**Figure S1.** The chromatogram of astilbin spiked plasma sample (1  $\mu\text{g}/\text{mL}$ ) treated with different volumes of acetonitrile (A) and methanol (B).

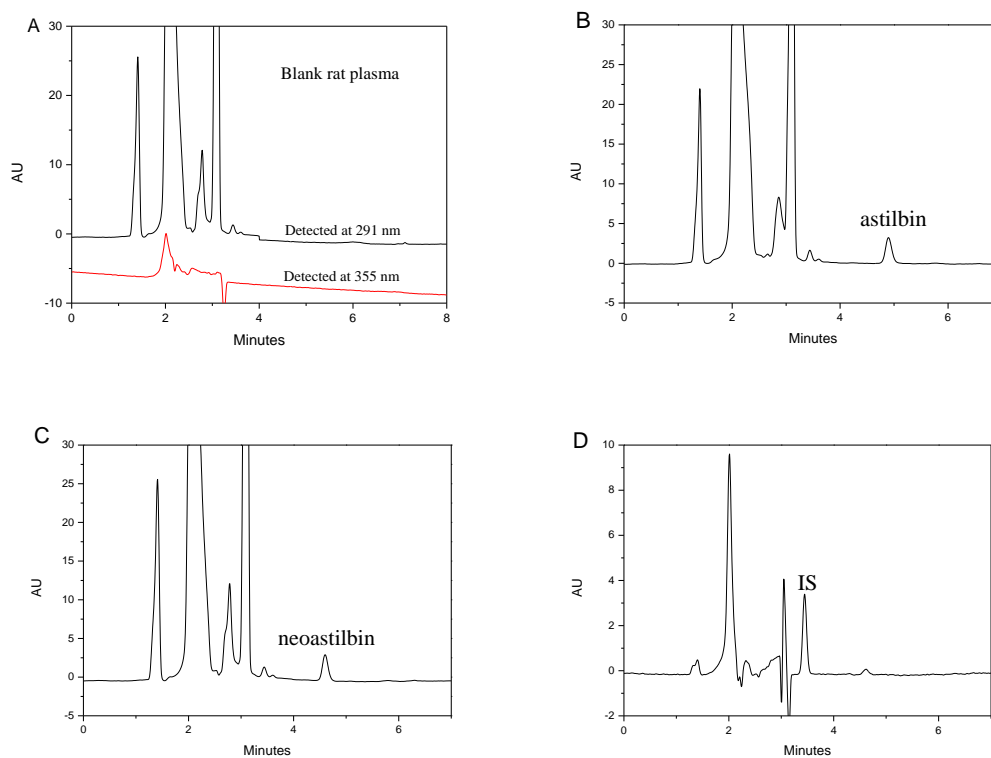

**Figure S2.** The chromatograms of astilbin, neoastilbin and IS (rutin). (A) blank rat plasma sample; (B) blank rat plasma sample spiked with astilbin (detected at 291 nm); (C) blank rat plasma sample spiked with neoastilbin (detected at 291 nm); ; (D) blank rat plasma sample spiked with IS (detected at 355 nm) .

**Sample Availability:** Samples of the compounds of astilbin and neoastilbin are available from the authors.

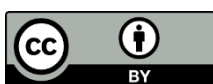

© 2020 by the authors. Submitted for possible open access publication under the terms and conditions of the Creative Commons Attribution (CC BY) license (<http://creativecommons.org/licenses/by/4.0/>).
